# Supplementary material for: Facile fabrication of highly efficient, reusable heterostructured Ag–ZnO–CdO and its twin applications of dye degradation under natural sunlight and self-cleaning
Source: Royal Society of Chemistry journal article supplement (doi:10.1039/c3ra45381b), 2013-12-05
Supplement: c3ra45381b.pdf [file c3ra45381b.pdf]

## Supporting Informations

### **Facile fabrication of highly efficient, reusable Heterostructured Ag-ZnO-CdO and its twin applications of dye degradation under natural Sun light and Self-Cleaning**

Subramanian Balachandran<sup>a</sup>, Sarojini Gopinathan Praveen<sup>b</sup>, Rengasamy Velmurugan<sup>a</sup>  
and Meenakshisundaram Swaminathan<sup>a\*</sup>

<sup>a</sup>Department of Chemistry, Annamalai University, Annamalainagar - 608 002, India

<sup>b</sup>Department of Physics, N. M Christian College, Marthandam, Kanyakumari - 629165, Tamil Nadu, India.

\*Corresponding author. Tel./fax: +91-4144-220572.

*E-mail address:* chemres50@gmail.com (M. Swaminathan)

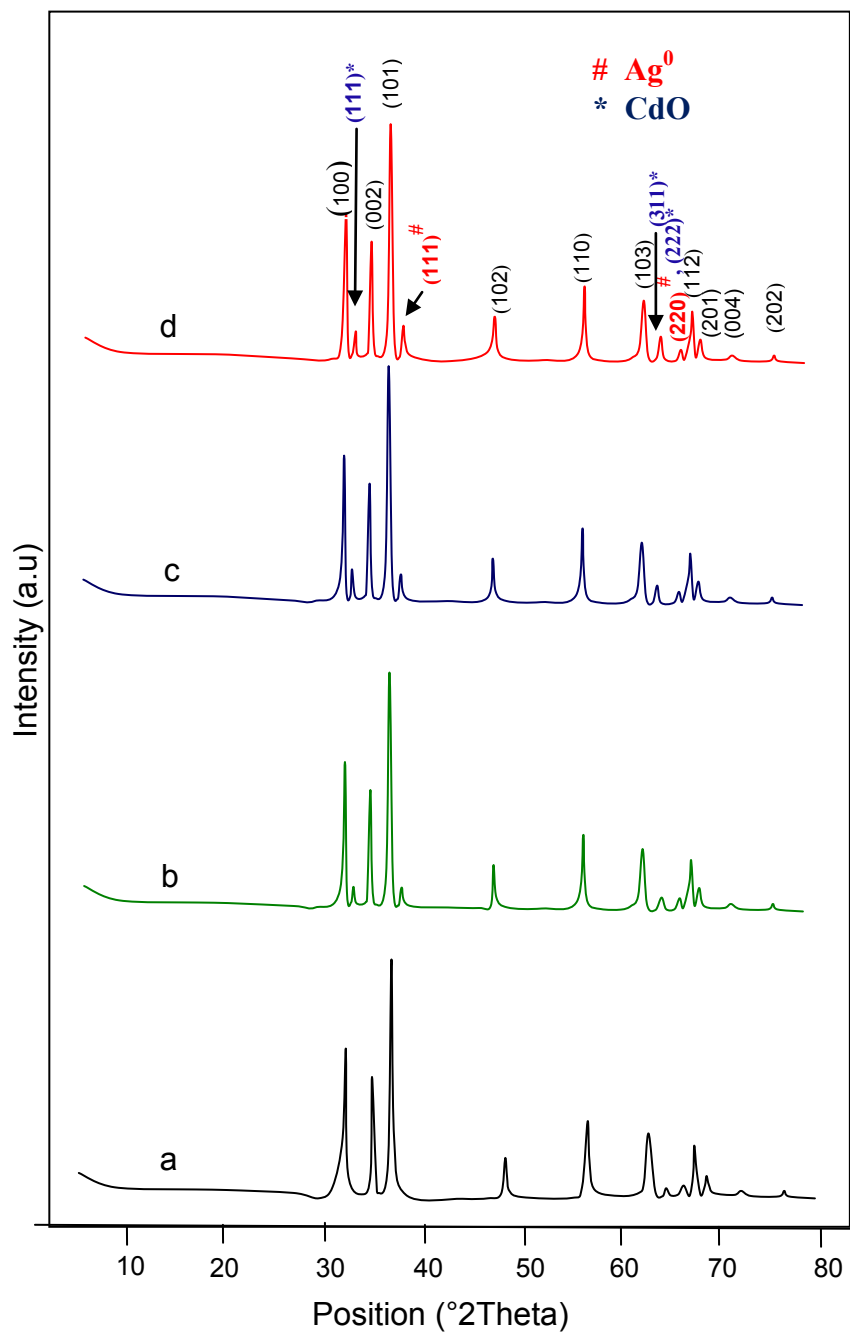

**Fig. S1** XRD pattern (a) prepared ZnO, (b) 3wt% of Ag contain Ag-ZnO-CdO, (c) 6 wt% of Ag contain Ag-ZnO-CdO and (d) 9wt% of Ag contain Ag-ZnO-CdO

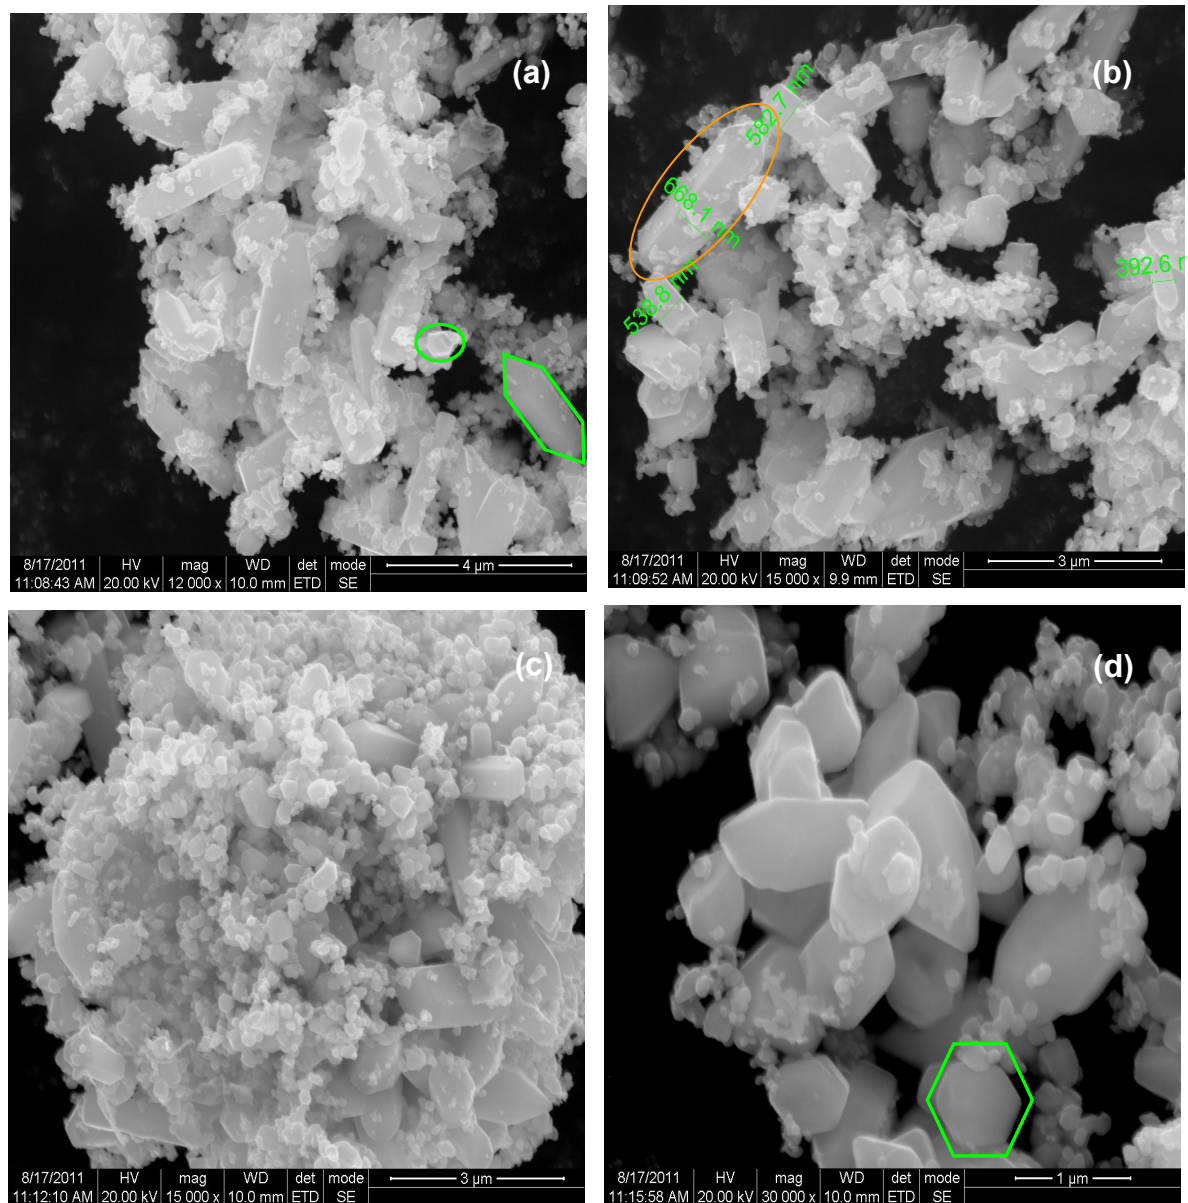

**Fig. S2** HR-SEM images of Ag-ZnO-CdO at different magnification (a) 12 K, (b-c) 15 K and (d) 30 K

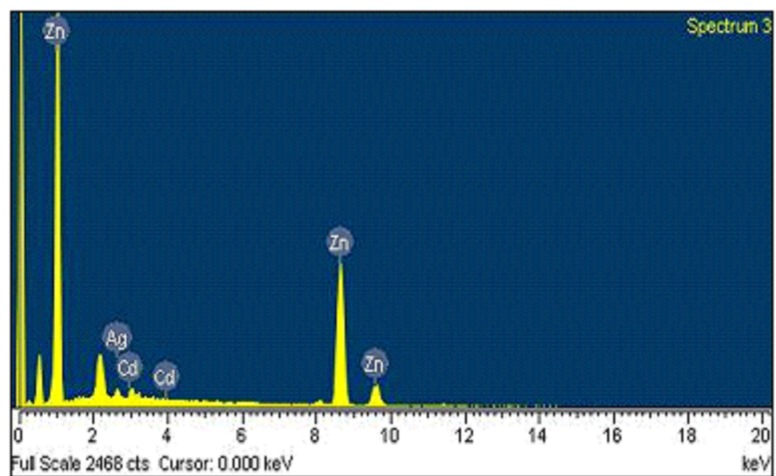

**Fig. S3** EDS of Ag-ZnO-CdO

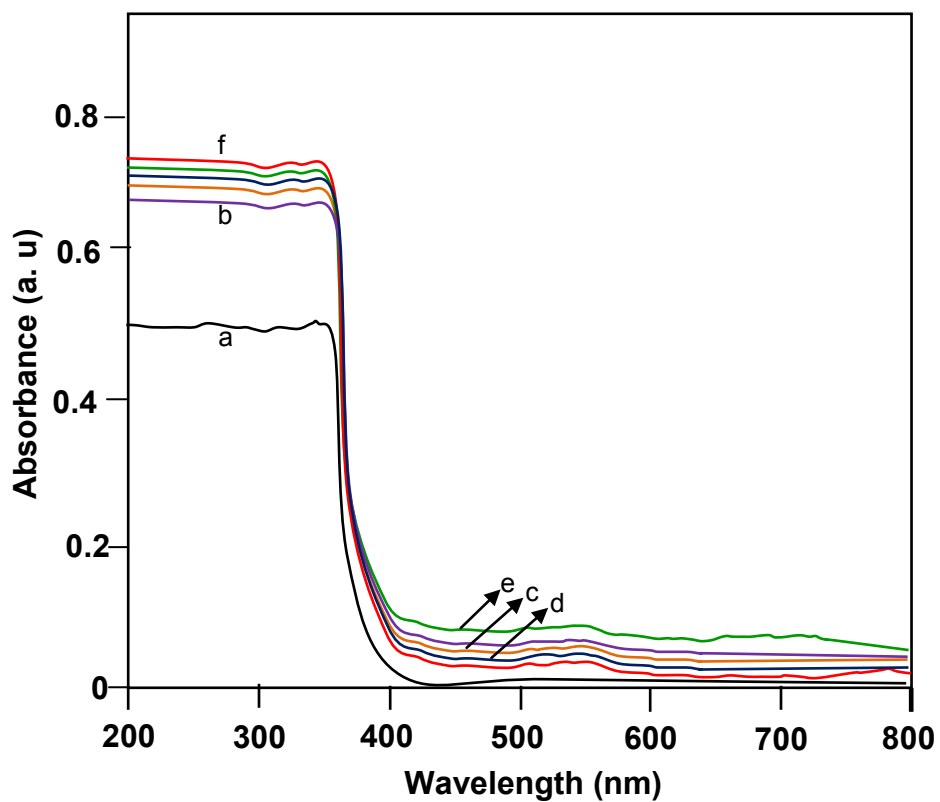

**Fig. S4** DRS of (a) prepared ZnO, (b) 1wt% CdO in Ag-ZnO-CdO, (c) 2wt% CdO in Ag-ZnO-CdO, (d) 3wt% CdO in Ag-ZnO-CdO, (e) 4wt% CdO in Ag-ZnO-CdO and (f) 1wt% CdO in Ag-ZnO-CdO.

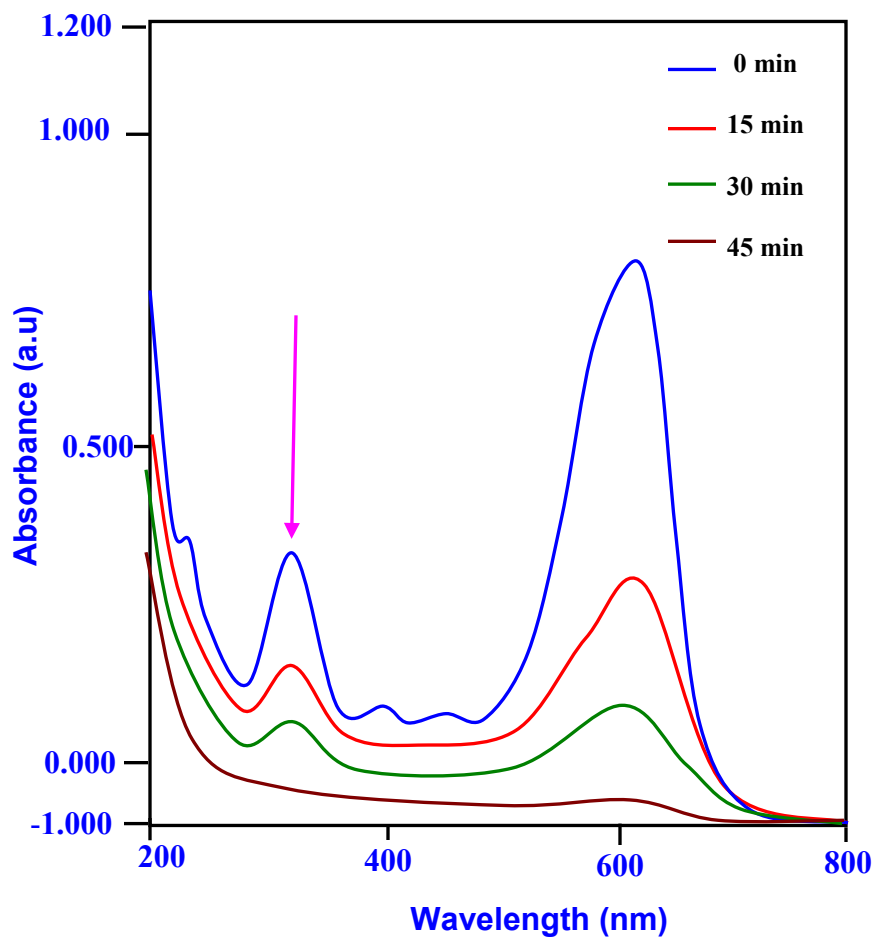

**Fig. S5** UV spectral changes of AB 1 at different irradiation times with Ag-ZnO-CdO

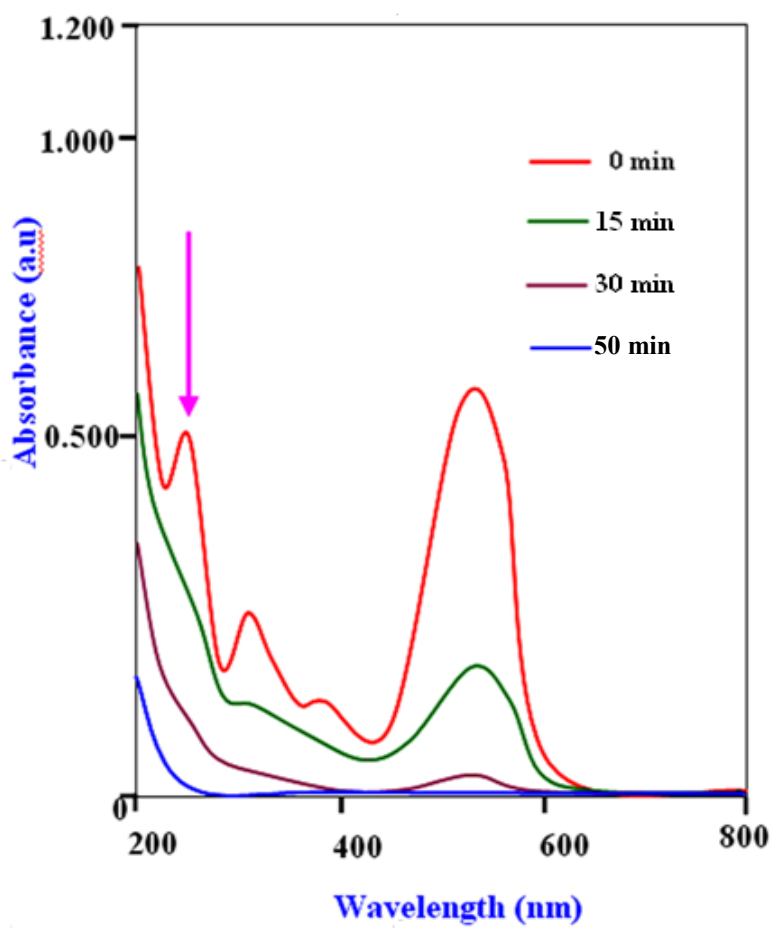

**Fig S6.** UV spectral changes of AV 1 at different irradiation times with Ag-ZnO-CdO

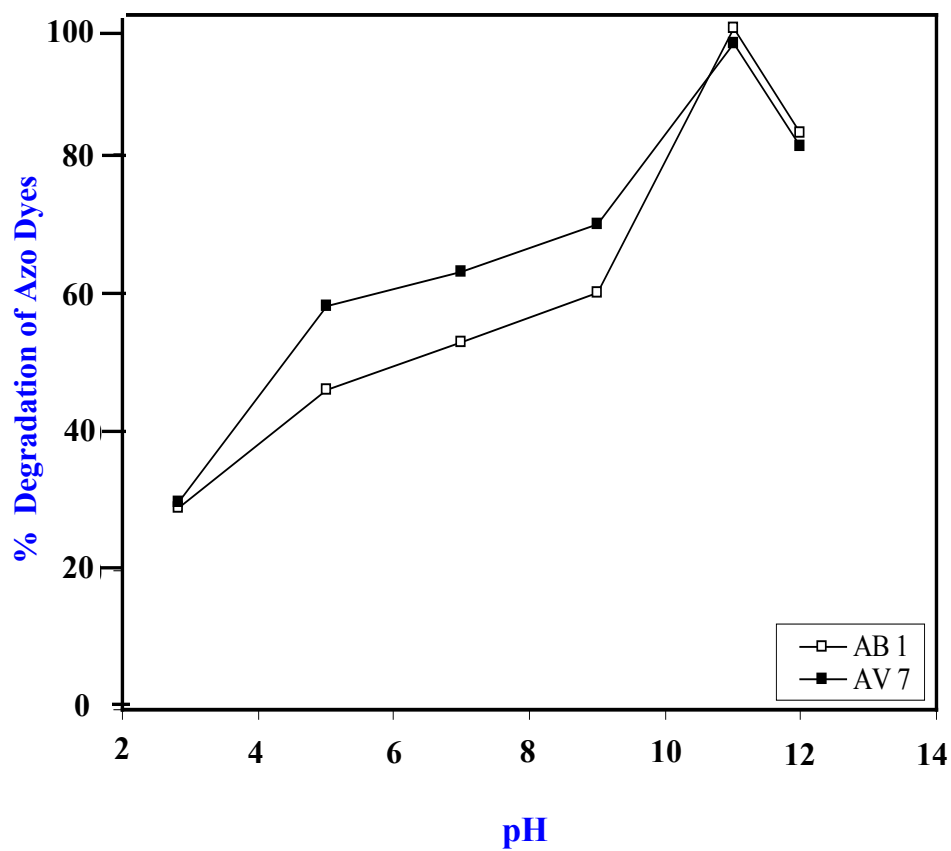

**Fig. S7** Effect of solution pH: AB 1: dye concentration =  $3 \times 10^{-4}$  M, catalyst suspended =  $3 \text{ g L}^{-1}$ , airflow rate =  $8.1 \text{ mL s}^{-1}$ ,  $I_{\text{solar}} = 1250 \times 100 \text{ Lux} \pm 100$  and irradiation time 45 min. AV 7 dye: dye concentration =  $5 \times 10^{-4}$  M, catalyst suspended =  $3 \text{ g L}^{-1}$ , airflow rate =  $8.1 \text{ mL s}^{-1}$ ,  $I_{\text{solar}} = 1250 \times 100 \text{ Lux} \pm 100$  and irradiation time = 50 min



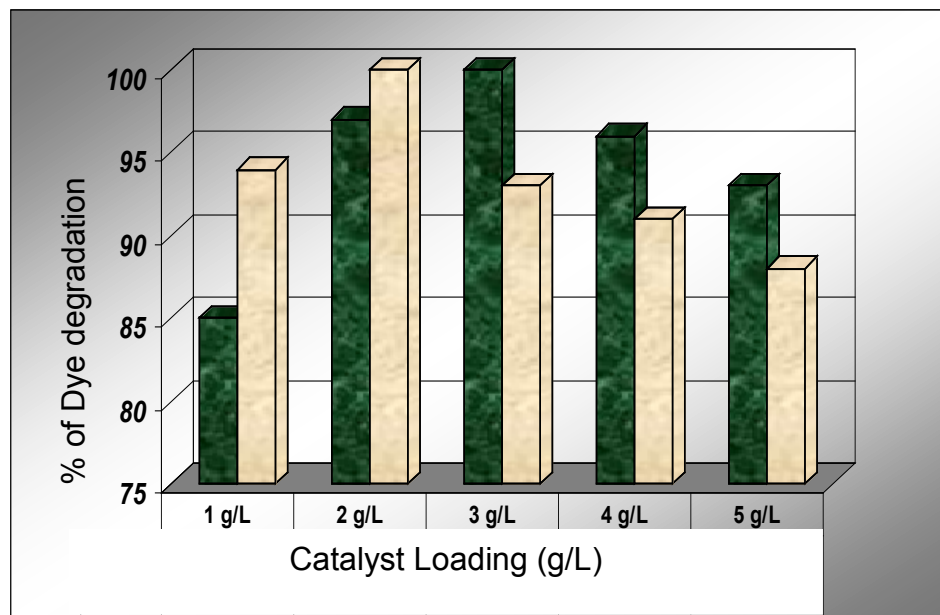

**Fig. S8** Effect of catalyst loading: (a) AB 1: dye concentration =  $3 \times 10^{-4}$  M, pH = 11, airflow rate =  $8.1 \text{ mL s}^{-1}$ ,  $I_{\text{solar}} = 1250 \times 100 \text{ Lux} \pm 100$  and irradiation time 45 min. (b) AV 7 dye: dye concentration =  $5 \times 10^{-4}$  M, pH = 11, airflow rate =  $8.1 \text{ mL s}^{-1}$ ,  $I_{\text{solar}} = 1250 \times 100 \text{ Lux} \pm 100$  and irradiation time = 50 min.

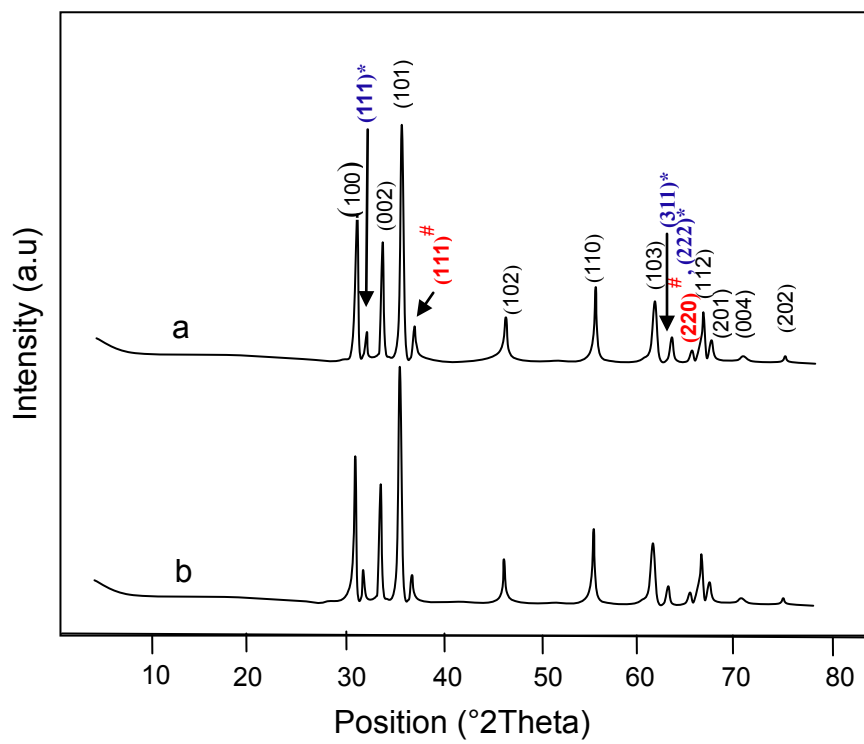

**Figure S9:** XRD pattern of (a) Fresh catalyst and (b) After 5<sup>th</sup> cycle reusable catalyst

**Table S1:** Percentage of AB 1 degradation by the catalysts with different concentrations of Ag and CdO in the catalyst for 45 minute of irradiation

| <b>Percentages of Ag in<br/>3wt% CdO-ZnO</b> | <b>Percentage of<br/>Degradation</b> |
|----------------------------------------------|--------------------------------------|
| 1wt%                                         | 96                                   |
| 3wt%                                         | 100                                  |
| 6wt%                                         | 94                                   |
| 9wt%                                         | 88                                   |

| <b>Percentages of CdO<br/>in 3wt% Ag-ZnO</b> | <b>Percentage of<br/>Degradation</b> |
|----------------------------------------------|--------------------------------------|
| 1wt%                                         | 89                                   |
| 2wt%                                         | 95                                   |
| 3wt%                                         | 100                                  |
| 4wt%                                         | 97                                   |
| 5wt%                                         | 94                                   |
